1 The gene *vitellogenin* affects microRNA regulation in honey bee (*Apis mellifera*) fat body and  
2 brain

3

4 Francis M. F. Nunes<sup>1,2,\*§</sup>, Kate E. Ihle<sup>3,4,\*</sup>, Navdeep S. Mutti<sup>3,#</sup>, Zilá L. P. Simões<sup>2</sup>, and Gro  
5 V. Amdam<sup>3,5</sup>

6

7 1 Universidade de São Paulo, Faculdade de Medicina de Ribeirão Preto, Departamento de  
8 Genética, Ribeirão Preto, SP, Brazil

9 2 Universidade de São Paulo, Faculdade de Filosofia, Ciências e Letras de Ribeirão Preto,  
10 Departamento de Biologia, Ribeirão Preto, SP, Brazil

11 3 Arizona State University, School of Life Sciences, Tempe, AZ, United States of America

12 4 Smithsonian Tropical Research Institute, Panama City, Panama

13 5 Norwegian University of Life Sciences, Department of Chemistry, Biotechnology and Food  
14 Science, Aas, Norway

15

16 § Current address: Universidade Federal de São Carlos, Departamento de Genética e  
17 Evolução, São Carlos, SP, Brazil

18 # Current address: DuPont-Pioneer Agricultural Biotechnology, DuPont Experimental  
19 Station, Wilmington, Delaware, United States of America

20

21 Keywords: *Apis mellifera*, miRNA, microarrays, RNAi, social behavior, vitellogenin

22

23 \*Authors for correspondence ([francis.nunes@ufscar.br](mailto:francis.nunes@ufscar.br); [kateihle@gmail.com](mailto:kateihle@gmail.com))

24

25 Running title: Vitellogenin affects miRNA regulation

26

27

28

29

30

31

32

### 33 **SUMMARY**

34 In honey bees, Vitellogenin (Vg) is hypothesized to be a major factor affecting hormone  
35 signaling, food-related behavior, immunity, stress resistance and lifespan. Likewise  
36 microRNAs play important roles in posttranscriptional gene regulation and affect many  
37 biological processes. The action of microRNAs and Vg are known to intersect in the context  
38 of reproduction; however, the role of these associations on social behavior is unknown. The  
39 phenotypic effects of Vg knockdown are best established and studied in the forager stage of  
40 workers. Thus, we exploited the well-established RNA interference (RNAi) protocol for Vg  
41 knockdown to investigate its downstream effects on microRNA population in honey bee  
42 foragers' brain and fat body tissue. To identify microRNAs that are differentially expressed  
43 between tissues in control and knockdown foragers, we used  $\mu$ Paraflo® microfluidic  
44 oligonucleotide microRNA microarrays. Our results show 76 and 74 microRNAs were  
45 expressed in the brain of control and knockdown foragers whereas 66 and 69 microRNAs  
46 were expressed in the fat body of control and knockdown foragers respectively. Target  
47 prediction identified potential seed matches for a differentially expressed subset of  
48 microRNAs affected by Vg knockdown. These candidate genes are involved in a broad range  
49 of biological processes including insulin signaling, juvenile hormone (JH) and ecdysteroid  
50 signaling previously shown to affect foraging behavior. Thus, here we demonstrate a causal  
51 link between the Vg knockdown forager phenotype and variation in the abundance of  
52 microRNAs in different tissues with possible consequences for regulation of foraging  
53 behavior.

54

### 55 **INTRODUCTION**

56 The gene *vitellogenin* (Vg) is found in almost all oviparous species and encodes a member of  
57 the large lipid transfer protein family. In insects, Vg is generally expressed in the abdominal  
58 fat body cells (functionally homologous to vertebrate liver and white adipose tissue) of  
59 reproductive females, and the protein product serves as a yolk precursor in egg development  
60 (for review see Postlethwait and Giorgi, 1985). However, Vg has evolved non-oogenic  
61 functions in several species including the honey bee (*Apis mellifera*, Linnaeus 1758), where  
62 the gene is expressed not only by reproductive queens but also by male drones and  
63 functionally sterile female workers (Engels, 1974; Rutz and Lüscher, 1974; Trenczek and  
64 Engels, 1986; Piulachs et al., 2003). In worker honey bees, Vg protein is found in

65 hypopharyngeal (head) glands and brain in addition to fat body and ovary tissue (Seehuus et  
66 al., 2007; Münch and Amdam, 2010). In workers, Vg has several functions: it incorporates  
67 into the hypopharyngeal glands for synthesis of proteinaceous secretions (jelly) that are fed to  
68 larvae, the queen and other adult bees (Amdam et al., 2003a), it promotes immunity, stress  
69 resilience and longevity (Amdam et al., 2004a), and it influences hormone levels, behavioral  
70 maturation and foraging biases (Guidugli et al., 2005; Nelson et al., 2007).

71 Honey bee societies are maintained by a highly-structured division of labor between  
72 queen and workers, and between workers with different phenotypes. Workers display  
73 different behavior in an age-related sequence, starting with labor inside the nest and usually  
74 ending with foraging activities (Winston, 1987). A worker's transition from nest tasks to  
75 foraging is mediated by decreasing Vg levels and increasing juvenile hormone (JH). Vg and  
76 JH have also been causally linked to transcriptional, physiological and metabolic changes in  
77 fat body and brain (Robinson, 1987; Huang et al., 1991; Nilsen et al., 2011; Wang et al.,  
78 2012a).

79 RNA interference (RNAi) has been used to untangle causal relationships between fat  
80 body signaling, brain, and honey bee behavior (Amdam et al., 2003b; Patel et al., 2007;  
81 Nelson et al., 2007; Nunes and Simões 2009; Ament et al., 2011). RNAi-mediated gene  
82 knockdown of Vg revealed a number of the protein's effects in honey bee workers, including  
83 that Vg slows the onset of foraging, promotes pollen collection, and increases immunity,  
84 oxidative stress resilience and lifespan (Amdam et al., 2003a; Amdam et al., 2004a; Nelson et  
85 al., 2007). JH, on the other hand, is a terpenoid compound and cannot be directly targeted  
86 with the RNAi method. However, molecular mechanisms associated with Vg's pleiotropic  
87 actions, including that of JH regulation, are currently largely unknown in honey bees.

88 In recent years, non-protein-coding RNAs have emerged as a dynamic regulatory layer  
89 involved in a wide range of biological processes. In animals, microRNAs are short non-  
90 coding transcripts that trigger endogenous gene silencing by partial base-pairing with the 3'  
91 untranslated region (3'UTR) of target mRNAs (for review see Bartel, 2009). Interestingly,  
92 many reported roles for microRNAs show parallels to Vg's functions in worker honey bees.  
93 MicroRNAs are able to act in the regulation of gene expression within (Chen et al., 2007) as  
94 well as between tissues (Liu et al., 2010). In many organisms, they participate in the  
95 regulation of complex behavioral phenotypes, such as migratory behavior of butterflies (Zhan  
96 et al., 2011), circadian rhythms of flies (Kadener et al., 2009), food-choice in giant pandas

97 (Jin et al., 2011), and song communication in zebra finches (Gunaratne et al., 2011).  
98 Moreover, they are linked to oxidative stress (Hulsmans et al., 2011) as well as immunity  
99 (Garbuzov and Tatar, 2010; Fullaondo and Lee, 2012) and lifespan in *Drosophila*  
100 *melanogaster* (Liu et al., 2012). In addition, the functions of specific microRNAs are closely  
101 related to oogenesis, including vitellogenesis, in both holometabolous and hemimetabolous  
102 insect species (Bryant et al., 2010; Tanaka and Piulachs, 2012). While reproductive pathways  
103 link microRNAs and Vg functions, these associations have not been explored in the context of  
104 insect social behavior. This evidence led us to ask whether the microRNA population could  
105 be working in concert with Vg to affect the behavior of adult workers.

106 A number of microRNA surveys have been performed in honey bees after genome  
107 sequencing (Honeybee Genome Sequencing Consortium, 2006) identified a portion of the  
108 species' microRNA population (Weaver et al., 2007; Chen et al., 2010). Some microRNAs  
109 are differentially expressed between the head, thorax, and abdomen of workers (Weaver et al.,  
110 2007), two microRNAs have been implicated in neural functions (Hori et al., 2011) and  
111 overexpressed microRNAs in the brain have been correlated with behavioral maturation  
112 (Behura and Whitfield, 2010). These studies show that research on honey bee microRNAs is  
113 worthwhile.

114 We investigated the effect of Vg knockdown on microRNA regulation in honey bee fat  
115 body and brain. We used RNAi to experimentally reduce Vg gene expression in worker honey  
116 bees. Both Vg knockdowns and controls were collected as foragers. We specifically targeted  
117 foragers as the behavioral effects of Vg downregulation are best characterized in this  
118 phenotype (Nelson et al., 2007; Ihle et al., 2010). Same-aged control and Vg knockdown  
119 foragers can be expected to have significantly different biases for nectar versus pollen  
120 collection, with Vg knockdowns collecting significantly less pollen than controls. We then  
121 examined the microRNA populations expressed in the foragers' fat body and brain tissues.  
122 We identified a subset of microRNAs that respond downstream to Vg knockdown and found  
123 that the microRNA response to Vg downregulation differs between fat body and brain. Our  
124 results provide new insights into how behavioral regulation may be achieved.

125

## 126 MATERIAL AND METHODS

127

128 *dsRNA synthesis*

129 All steps and reagents for the synthesis of double stranded RNA (dsRNA), the molecules that  
130 trigger RNAi, were based on a well-established protocol as previously described (for details  
131 see Amdam et al., 2006, section 2.2). We synthesized dsRNA for *Vg* knockdown (dsRNA-  
132 *Vg*) and for green fluorescent protein (dsRNA-GFP) as the sham control. There are several  
133 options for such controls, but dsRNA-GFP is the most frequently used in honey bees (Maori  
134 et al., 2009; Jarosch and Moritz, 2011; Kamakura, 2011; Ament et al., 2012; Desai et al.,  
135 2012). The dsRNA products were diluted with nuclease-free water (Qiagen, Valencia, CA,  
136 USA) to the final concentration of 10 µg/µl.

137

### 138 *Bees*

139 Worker honey bees (*Apis mellifera* L.) were obtained from six wild-type (unselected  
140 commercial stock) source colonies maintained at the Honey Bee Research Laboratory located  
141 at the Arizona State University Polytechnic Campus, Gilbert, AZ, USA. dsRNA injections  
142 were performed on six successive days. On each day equal numbers of newly-emerged bees  
143 (<24 h-old) from two source colonies were mixed. We used a toggled collection scheme to  
144 ensure that the same colony pair (out of the six participating source colonies) was not sampled  
145 more than once. After injection, bees were introduced to one of three wild-type host colonies  
146 kept at the Arizona State University Main Campus, Tempe, AZ, USA. Bees injected on days  
147 1 and 4 were introduced into host colony 1, bees injected on days 2 and 5 were introduced  
148 into host colony 2, and bees injected on days 3 and 6 were introduced into host colony 3.

149

### 150 *Injections*

151 Before injections, newly-emerged bees were anesthetized at 4°C for 5 min and immobilized  
152 on a wax substrate using crossed needles. Each day, 100 bees per treatment group were  
153 dorsally injected under the 5th abdominal segment with a volume of 2 µl (10 µg/µl) of  
154 dsRNA-*Vg* or dsRNA-GFP using a Hamilton micro syringe fitted with a 30G needle (Becton  
155 Dickinson, Franklin Lakes, NJ, USA). Individuals showing signs of hemolymph leakage after  
156 injection were discarded. After injection bees were paint-marked on the thorax or abdomen to  
157 identify treatment group and day of injection. Bees were introduced into a host nucleus  
158 colony in perforated cylindrical cages, allowing them to receive social interactions and  
159 nourishment. After 24 h bees were released from the cages.

160

161 *Foraging observation and bee sampling*

162 We collected same age bees to control for effects due to chronological aging. In order to  
163 ensure that sufficient numbers of treated bees had initiated foraging in all colonies before  
164 collection, we monitored colony entrances to observe returning foragers. Forager counts were  
165 performed three times each day during peak foraging hours. We obstructed nest entrances for  
166 ten-minute periods and counted all returning, marked foragers. We observed large number of  
167 marked bees returning from foraging trips 15 days post-injection and began sample collection.  
168 Marked bees returning to the colony from flights were collected for processing. In our sample,  
169 we included only workers with pollen and/or nectar loads to ensure all individuals were  
170 indeed foragers. Approximately 10 individuals per treatment and injection day were collected  
171 from each host colony.

172  
173 *Dissection and RNA isolation*

174 Bees were anesthetized at 4°C for 5 min and kept on ice prior to tissues dissection. In order to  
175 prevent RNA degradation as much as possible, we quickly dissected brain and fat body (both  
176 dissections were completed within approximately 1 min after the bee was killed) from each  
177 bee collected. In brief, brains were dissected under a stereomicroscope and carefully cleaned  
178 inside a drop of nuclease-free water for a complete elimination of adjacent glands and tissues.  
179 Abdominal carcasses were separated from digestive, reproductive, and venom systems by  
180 pulling the sting apparatus. Abdominal carcass (lined with fat body) and brain of each bee  
181 were separately preserved in 500 µl of QIAzol (Qiagen) and stored at -80°C until RNA  
182 isolation. In order to separate large (>200 nucleotides, for knockdown validation) and small  
183 (<200 nucleotides, rich in microRNAs, for array experiments) RNA fractions, miRNeasy kit  
184 (Qiagen) and RNeasy MinElute Cleanup kit (Qiagen) were combined, following  
185 manufacturer's instructions. In brief, each individual tissue was homogenized in QIAzol Lysis  
186 Reagent, a monophasic solution of phenol and guanidine thiocyanate. Chloroform was added  
187 to obtain an aqueous phase containing RNA partitions, which was mixed with a 70% ethanol  
188 solution and pipetted into a RNeasy Mini spin column for centrifugation. At this point, large  
189 RNAs were retained on the column membrane, while the flow-through contained small  
190 RNAs. From here, the isolation of small RNA (Round 1) and large RNA (Round 2) followed  
191 different protocols. Round 1: in order to purify the miRNA-enriched fraction, 100% ethanol  
192 was added to the flow-through solution and mixed thoroughly by vortexing. The solution was

193 transferred to a RNeasy MinElute spin column and centrifuged to bind RNA to the  
194 membrane. Phenol and other contaminants were removed by washes with buffer RPE  
195 (provided by the kit) and 80% ethanol solution. The microRNA-enriched fraction was then  
196 eluted in RNase-free water. Round 2: in order to purify the large RNA fraction, the column  
197 membrane was washed with Buffer RWT (provided by the kit). After centrifugation,  
198 membrane-bound RNA was treated with DNase I. Contaminants were removed by washes  
199 with buffers RWT and RPE. The large RNA fraction was then eluted in RNase-free water. All  
200 samples were quantified using a NanoDrop ND-1000 (NanoDrop Technologies, Wilmington,  
201 DE, USA).

202

### 203 *Quantitative RT-qPCR for knockdown validation*

204 To validate *Vg* knockdown, one-step reverse transcription-polymerase chain reaction (RT-  
205 qPCR) for *Vg* and *actin* (as reference gene, GenBank accession number AB023025) were  
206 performed for all brain (n=30 for dsRNA-*Vg* and n=30 for dsRNA-GFP) and fat body (n=30  
207 for dsRNA-*Vg* and n=30 for dsRNA-GFP) samples using QuantiTect SYBR Green RT-PCR  
208 Master Mix kit (Qiagen) and ABI Prism 7500 (Applied Biosystems, Foster City, CA, USA).  
209 Primers for *Vg* (5'-GTTGGAGAGCAACATGCAGA-3' and 5'-  
210 TCGATCCATTCCTTGATGGT-3') and *actin* (5'-TGCCAACACTGTCCTTTCTG-3' and 5'-  
211 AGAATTGACCCACCAATCCA-3') amplification were the same as previously used  
212 (Amdam et al., 2004b). For each sample, reactions were assembled in triplicate, and each  
213 single reaction consisted of 13.5  $\mu$ l Master Mix (provided by kit), 8.1  $\mu$ l nuclease-free water,  
214 1.5  $\mu$ l of each primer (forward and reverse), 0.27  $\mu$ l of the RT enzyme (provided by kit) and 2  
215  $\mu$ l (25 ng/ $\mu$ l) of large RNA fraction as a template. Negative controls without addition of RT  
216 enzyme were run to check for contamination by genomic DNA. Individual *Vg* mRNA level  
217 was log<sub>2</sub>-transformed and relative quantities were calculated according to  $2^{-\Delta\Delta C_t}$  method  
218 (Applied Biosystems, user bulletin #2). We log<sub>2</sub>-transformed the data in order to approximate  
219 normality as is often done with gene expression data sets, as these data are non-linear and the  
220 variance is often very unequal across the samples (Ballman, 2008; Rieu and Powers, 2009).

221

### 222 *microRNA microarrays sample preparation*

223 Six biological samples of small RNA fraction were prepared for each treatment group from  
224 brain and fat body. Each biological sample was a pool of RNA from 5 individuals

225 representing all 3 host colonies and 6 days of injection. Brain or fat body-derived RNA from  
226 the same 5 individuals was pooled to generate corresponding biological samples for both  
227 tissues. Pools were named as “control forager brain” (GFBr), “knockdown forager brain”  
228 (VFBr), “control forager fat body” (GFFb), “knockdown forager fat body” (VFFb), followed  
229 by a number from 1 to 6 (eg. GFBr-1, VFFb-4), such that GFBr-1 and GFFb-1 represented  
230 pooled tissues from the same 5 individuals. Each brain pool contained a total of 1 µg of small  
231 RNA fraction, to which each of the 5 individuals contributed equally (200 ng). Each fat body  
232 pool contained a total of 2 µg of small RNA fraction, to which each of the 5 individuals  
233 contributed equally (400 ng). Pools were sent to LC Sciences (Houston, TX, USA) for  
234 microRNA analysis using µParaflo<sup>®</sup> microfluidic oligonucleotide microarray technology.

235

### 236 *microRNA microarrays design and analysis*

237 Microfluidic chips were customized containing 18 repeated probes for each of 168 known  
238 honey bee mature microRNAs available at miRBase, release 17 (Kozomara and Griffiths-  
239 Jones, 2011). In addition, the manufacturer added 56 control probes (each one repeated 4 to  
240 16 times) for quality control of chip fabrication, RNA integrity, RNA labeling reaction, and  
241 experiment conditions. In particular, these controls included spike-in RNA sequences and  
242 probes targeting different sections of conserved 5S ribosomal RNA for *Apis mellifera* (6  
243 probes) and *Drosophila melanogaster* (6 probes). To avoid dye related bias, a simple-sample  
244 assay was performed so that 500 ng of each small RNA pool was Cy3-labeled at 3'ends, and  
245 each labeled pool was hybridized to one chip. All microarray reagents and detailed steps used  
246 for labeling, hybridization, image acquisition, normalization and data analysis were identical  
247 as reported by Zhou et al. (2012). In brief, normalization was performed using LOWESS  
248 method whereas T test were applied to evaluate statistical significance of differentially  
249 expressed microRNAs within tested tissues. In compliance with MIAME standards (Brazma  
250 et al., 2001), all microarray data is available on the NCBI Gene Expression Omnibus database  
251 (GEO) under the accession number GSE44917.

252

### 253 *Target prediction analysis*

254 In order to infer regulatory relationships, we searched for base-pairing between the most  
255 relevant mature microRNA sequences found in our dataset and 3'UTR sequences from honey  
256 bee protein-coding genes described to be involved in behavioral maturation. We selected a list



257 of genes by performing a literature search on both NCBI-PubMed  
258 (<http://www.ncbi.nlm.nih.gov/pubmed/>) and ISI Web of Knowledge  
259 (<http://www.webofknowledge.com/>) for the terms “bee”, “foraging behavior”, and “gene”. To  
260 simplify our analysis, only genes with individually tested associations with foraging behavior  
261 were included in our analysis (Table A1). For example, this excludes data from microarray or  
262 transcription profiling studies in general, but does include the individually validated genes  
263 from those studies.

264 Predicted or validated 3'UTR sequences were recovered from NCBI-GenBank, and  
265 microRNA mature sequences were extracted from miRBase (Table A2). The first 8  
266 nucleotides at the 5' end of microRNAs, called seeds, are critical for target recognition and  
267 largely used in computational approaches (Bentwich, 2005). We used a conservative criteria  
268 based exclusively on perfect Watson-Crick matches of seeds ranging from 6-8 nucleotides  
269 (positions 1-8, 1-7, 2-8, 2-7), since they are frequently found in both invertebrate and  
270 vertebrate species (Gaidatziz et al., 2007). A network-based graph was constructed using the  
271 software Cytoscape, version 2.7.0 (Shannon et al., 2003).

272

## 273 **RESULTS**

274

### 275 *Vitellogenin downregulation in fat body and brain*

276 Intra-abdominally injected dsRNA against *Vg* in newly-emerged bees resulted in a significant  
277 reduction of *Vg* mRNA in forager fat bodies (one-way ANOVA of log<sub>2</sub>-transformed data,  
278  $F_{1,60}=21.9482$ ,  $p = 0.000017$ , Fig. 1A) when compared to the same-aged controls (injected  
279 with dsRNA-GFP). Other factors “day of collection” and “qPCR plate” were not significant  
280 ( $F_{5,43}=0.0413$ ,  $p = 0.9989$  and  $F_{10,43}=0.5315$ ,  $p = 0.8584$  respectively) and thus were dropped  
281 from the final analysis. *Vg* downregulation also occurred in the brain (one-way ANOVA of  
282 log<sub>2</sub>-transformed data,  $F_{1,60}=6.1553$ ,  $p = 0.016024$ , Fig. 1B). Again factors “day of  
283 collection” and “qPCR plate” were not significant ( $F_{5,45}=0.2608$ ,  $p = 0.932$  and  $F_{9,45}=0.7881$ ,  
284  $p = 0.628$  respectively) and were dropped from analysis.

285

### 286 *General findings on microRNA expression*

287 We consider as “expressed” those microRNAs in which the averaged signal from the  
288 microarrays was detectable above background in at least two different pools of the same

289 treatment group. Following this criterion, 76, 74, 66, and 69 microRNAs were expressed in  
290 GFBr, VFBr, GFFb, and VFFb groups, respectively (Fig. 2). Forty-six of these microRNAs  
291 were expressed in all groups, while others were shared between 3 groups or less, or were  
292 group-specific. Seventy-two of the microRNAs on the array were not detected in our  
293 experiments (Table A3).

294 Fluorescence intensity varied from ~20 to ~40,000 intensity units (digitally defined,  
295 relative units). Previous microRNA profiling studies using microarrays or deep-sequencing  
296 have separated small subset of highly expressed microRNAs from a larger group of  
297 microRNAs that are expressed at low levels (Shao et al., 2010; Cristino et al., 2011; Li et al.,  
298 2011; Wei et al., 2011). Based on these studies, we assigned a cutoff of 1,000 intensity units  
299 above which microRNAs would be considered as highly expressed to generate a subset of  
300 microRNAs for closer comparison. Only approximately 20 microRNAs per treatment/tissue  
301 group met this criterion as highly expressed. Thirteen of these microRNAs were highly  
302 expressed across both tissue and treatment (Table 1).

303 The data also allowed us to identify a set of microRNAs with stable expression within  
304 each tissue (Table A4), serving as potential housekeepers for future studies. Comparing the  
305 top 10 stable microRNAs in brain versus fat body, only miR-263 showed similar expression  
306 in all 4 groups.

307

#### 308 *microRNAs tissue specific response to vitellogenin downregulation*

309 *Vg* knockdown in forager fat bodies caused downregulation of *let-7* and miR-281 and  
310 upregulation of miR-3739, miR-3776, miR-3796, miR-316, and miR-3718a (Table 2). The  
311 downregulation of miR-750 and upregulation of miR-3749, miR-3745, and miR-133 was  
312 suggestive ( $p < 0.10$ ) but was not statistically significant.

313 The knockdown of *Vg* in the workers' fat bodies was associated with a parallel  
314 decrease in the brain transcript levels of *Vg* as well as decreased expression of miR-252, miR-  
315 1, and miR-375 levels, while miR-989, miR-92a, and miR-31a were up-regulated (Table 3).  
316 Downregulation of miR-3049 was suggestive ( $p < 0.07$ ) but was not statistically significant.

317

#### 318 *Target prediction*

319 Our literature search retrieved 68 protein-coding genes (Table A1) of which 61 have available  
320 3'UTR information in NCBI-GenBank. We compared those 3'UTR sequences against 18

321 mature microRNA sequences, resulting from our analysis in fat bodies (11 microRNAs, see  
322 Table 2) and brains (7 microRNAs, see Table 3). Thirty-two out of 61 coding-genes presented  
323 one or multiple seed sites in their 3' ends for one or more microRNAs. Both miR-3745 and  
324 miR-184 had no target genes. The most microRNA-connected genes were  
325 *acetylcholinesterase* (AChE-2), *fushi tarazu factor 1* (ftz-f1), *tyrosinase receptor* (TYR) and  
326 *mapmodulin* (Map). miR-375, miR-252, miR92a and miR-316 presented the greater number  
327 of target genes (Fig. 3).

328

## 329 **DISCUSSION**

330

331 The pleiotropic influence of *Vg* as a key regulator of honey bee social behavior has been  
332 previously demonstrated by different scientific approaches (Amdam et al., 2004a; Seehus et  
333 al., 2006; Nelson et al., 2007; Marco Antonio et al., 2008). However, a detailed understanding  
334 of the molecular mechanisms that link *Vg* to behavior is in its infancy. To date, the  
335 investigation on the regulation of foraging behavior in honey bee workers has mainly  
336 explored the roles of protein-coding genes and their physiological connections. But the recent  
337 emergence of non-coding RNAs highlights the complexity of the gene expression networks  
338 that regulate many biological processes (Mattick and Gagen, 2001). Accordingly, a growing  
339 body of evidence has linked microRNA expression and behavioral traits (Kadener et al.,  
340 2009; Gunaratne et al., 2011; Jin et al., 2011; Zhan et al., 2011). We herein investigated  
341 whether microRNAs may work downstream of *Vg* in order to effect social changes. Toward  
342 this end, we knocked down *Vg* expression in adult workers to identify potential consequences  
343 on the microRNA populations in tissues central to bee behavior: the brain and the fat body.

344

345 *Vitellogenin mRNA levels decrease in brain in parallel with its knockdown in the fat body of*  
346 *foragers*

347 The data showed that *Vg* transcript abundance was reduced in the brain when the gene was  
348 targeted for downregulation in the fat body. *Vg* knockdown in fat body was expected as  
349 successful *Vg* RNAi is routinely achieved in this tissue (Amdam et al., 2003b; Guidugli et al.,  
350 2005; Amdam et al., 2006; Nelson et al., 2007; Nunes and Simões, 2009; Ihle et al., 2010).  
351 However, to our knowledge, this is the first detection of a concomitant reduction in the head.  
352 Several studies suggest that direct RNAi effects are difficult to achieve in the honey bee brain

353 (Wang et al., 2010; Jarosch and Moritz, 2011). After abdominal injection of fluorescently  
354 labeled siRNAs (small interfering RNAs), no fluorescent signals were detectable in head  
355 tissue in worker honey bees, which could suggest that the siRNAs do not pass the  
356 neurilemma, an insect blood-brain barrier (Jarosch and Moritz, 2011). When RNAi-induced  
357 gene knockdowns have been effective in honey bees, it has required local injections directly  
358 into brain tissue (Farooqui et al., 2003; Farooqui et al., 2004; Mustard et al., 2010).

359 It is therefore possible, and even probable, that our observation of reduced *Vg*  
360 transcript levels in the brain is not caused by RNAi directly, but rather is the product of a  
361 global or brain specific response to peripheral signaling following *Vg* RNAi in the fat body,  
362 such as reduced *Vg* levels in the haemolymph. This explanation further implies that the  
363 microRNA responses we observe in brain can be due to one or more of several explanations:  
364 (i) they are caused by remote signaling triggered by RNAi in the fat body, (ii) they are caused  
365 by secondary *Vg* reduction in the brain, (iii) they are part of the machinery that causes  
366 secondary *Vg* reduction in the brain, (iv) they are the result of longer foraging experience due  
367 to RNAi triggered precocious foraging. However, more studies are required to elucidate how  
368 fat body *Vg* RNAi affects brain and the role of microRNAs in that process. Such  
369 experimentation might also reconcile our findings with previous work, performed on a  
370 different genetic stock of honey bees, which recorded a compensatory upregulation of *Vg* in  
371 brain when fat body expression of *Vg* was experimentally reduced (reviewed in Münch and  
372 Amdam, 2010).

373

#### 374 *microRNA profiles affected by vitellogenin knockdown in foragers*

375 Experimental downregulation of *Vg* induces significant changes in the expression of a  
376 restricted number of microRNAs in fat body, the site of *Vg* synthesis. We also observed  
377 effects of treatment on the microRNA expression patterns in the brains of foragers. Possible  
378 explanations for the changes in brain microRNA expression were discussed in the above  
379 section. Though we are not able to distinguish between these and other possibilities from our  
380 data, the predicted targets of the microRNAs along with their potentially conserved functions  
381 can suggest answers.

382

#### 383 *microRNA target prediction in genes associated with foraging behavior*

384 Upregulation of microRNAs is often associated with post-transcriptional suppression of target  
385 genes (Bartel et al., 2009); however, a growing body of evidence suggests that microRNAs  
386 can also induce upregulation of their targets (reviewed in Vasudevan, 2012). Thus, direct  
387 experimentation is necessary not only to confirm the ability of microRNAs to affect predicted  
388 target genes, but also to verify the effects under physiologically relevant conditions. Our  
389 target prediction identified potential seed matches for microRNAs influenced by *Vg*  
390 knockdown in an increasingly well-studied axis involving JH, ecdysteroids, and the *insulin*  
391 *receptor substrate* (IRS) gene known to affect honey bee foraging behavior (Velarde et al.,  
392 2009; Wang et al., 2009; Wang et al., 2012a).

393 JH response to *Vg* reduction is likely involved in the regulation of the forager  
394 phenotype of *Vg* knockdowns (Guidugli et al., 2005; Marco Antonio et al., 2008; Ihle et al.,  
395 2010), but the mechanism by which *Vg* titers influence JH levels are currently not well  
396 understood. We have identified JH associated genes that are potential targets of microRNAs  
397 significantly up- and down-regulated after *Vg* knockdown. The putative JH receptor  
398 *ultraspiracle* (Jones and Sharpe, 1997; Barchuk et al., 2004 (USP)) is a likely target of  
399 microRNAs with increased and reduced expression in response to *Vg* reduction in both brain  
400 and fat body. *Juvenile hormone inducible protein 26* (Jhi-26), which is expressed in response  
401 to JH or its analogues, is a potential target of microRNAs upregulated in response to *Vg*  
402 knockdown in both brain and fat body. microRNAs that are significantly downregulated in the  
403 brains of *Vg* knockdown foragers potentially target genes encoding JH degrading enzymes,  
404 *JH esterase* and *JH epoxide hydrolase*. These results could suggest a role of microRNAs in  
405 the suppressive effect of *Vg* on JH, and the release of JH synthesis when *Vg* is knocked down.

406 New evidence makes it increasingly likely that ecdysteroids influence honey bee  
407 social behaviors (Velarde et al., 2009; Wang et al., 2009; Wang et al., 2012b), and we have  
408 identified microRNAs that may be part of this pathway. *Hormone receptor-like in 46* (HR46)  
409 and *ftz-fl* are predicted targets of microRNAs that are themselves affected by *Vg* knockdown.

410 Nutrient status is associated with behavioral phenotype and roles for nutrient sensing  
411 pathways including the insulin/insulin-like signaling pathway have been identified (Toth et  
412 al., 2005; Ament et al., 2008; Wang et al., 2010). Our target analysis predicts a role for  
413 several microRNAs with expression modulated by *Vg* knockdown or its downstream effects.  
414 *Phosphoinositide-dependent kinase-1* (PDK1), *Phosphatase and tensin homolog* (PTEN),  
415 *Phosphoinositide 3-kinase* (PI3K), and *Phosphatidylinositol-4-phosphate-5-kinase* (PIP5K)

416 are all potential targets for microRNA action downstream of Vg. These genes are also  
417 downstream of *IRS*, an insulin and epidermal growth factor pathway gene that can modify  
418 honey bee foraging behavior directly (Wang et al., 2010).

419 The regulation of foraging behaviors in honey bees is a complex process that we are  
420 only beginning to understand. At the colony level, there are many known factors that  
421 influence when an individual worker begins to forage and what she collects as a forager.  
422 These factors include cues and signals from larvae, the queen, other workers, and levels of  
423 stored food (Pankiw et al., 1998; Dreller and Tarpy, 2000; Amdam et al., 2006). The effects  
424 these cues have on individual behavior are mediated by genotype, nutrient stores, and other  
425 internal factors (Page and Fondrk, 1995; Pankiw and Page, 2001; Toth et al., 2005).

426 It has been suggested that microRNAs might function in developmental robustness, a  
427 process by which an organism compensates for environmental, genetic or other potential  
428 disruptions, to maintain a developmental program (Stark et al., 2005; Hornstein et al., 2006;  
429 Shomron, 2010). Here we propose that microRNAs may have a similar role in the regulation  
430 of honey bee foraging behavior, functioning as integrators of various molecular inputs to  
431 maintain and regulate a foraging phenotype in response to a complex network of cues.

432

#### 433 *Promising candidate microRNAs for future studies*

434 Among the microRNAs differentially regulated in response to *Vg knockdown* are promising  
435 candidates for future targeted studies on the molecular pathways linked to Vg-microRNA  
436 networks directly impacting social behavior.

437 We found that *Vg* knockdown resulted in decreased expression of *let-7* in forager fat  
438 bodies. This suggests that the decline in *let-7* expression observed by Behura and Whitfield  
439 (2010) between young nurses and old foragers could be the consequence of reduced Vg levels  
440 in the old foragers. Predicted target analysis for *let-7* connects this microRNA with genes  
441 associated with an increasingly well-studied axis involving, ovarian signaling, JH, and  
442 ecdysteroids (Wang et al, 2012b).

443 miR-133 was previously considered to be a muscle-specific microRNA, but it is now  
444 known to also have a role in differentiation of murine adipose tissues (Trajkovski et al., 2012  
445 and references therein). miR-133 is conserved between vertebrates and invertebrates (see  
446 miRBase, <http://www.mirbase.org>), suggesting that its functions could be phylogenetically  
447 retained. miR-133 thus could be associated with the lipid loss observed in foragers and

448 therefore, is a good target for future research on the mechanisms of behavioral progression in  
449 bees.

450 Here, we found miR-252 is the highest expressed microRNA in brains (Table 1) and is  
451 down-regulated in brains of *Vg* knockdown foragers compared to controls (Table 3).  
452 Moreover, miR-252 showed a large number of target genes in flies (Marrone et al., 2012) and  
453 was one of the most connected microRNA in our network (Fig. 3). Together, this evidence  
454 suggests that miR-252 is a key brain regulator that deserves future attention.

455 To date, miR-3739 is only found in honey bees (Chen et al., 2010). Its species-  
456 specificity as well as its very high expression in the fat body of *Vg* knockdown foragers  
457 (nearly 8 times that of controls, Table 2) suggest that miR-3739 is also a promising candidate  
458 for future research.

459

#### 460 *A role for microRNAs in the regulation of honey bee behavioral maturation*

461 Three previous studies examined microRNA expression differences in nurse and forager bees  
462 (Behura and Whitfield, 2010; Greenberg et al., 2012; Liu et al., 2012). Behura and Whitfield  
463 (2010) identified microRNAs differentially expressed in the brains of young nurses versus old  
464 foragers, while Greenberg et al. (2012) sequenced microRNA transcriptome from worker  
465 heads in the context of division of labor. Liu and colleagues (2012) used whole head extracts  
466 of nurses and foragers of unknown ages to make similar comparisons. We found limited  
467 overlap between our results and those of the earlier studies.

468 In our study, miR-2796 is among the top 10 highly expressed microRNAs in both  
469 brain groups (GFBr and VFBr, with intensities above 7,500 digitally units) and is not affected  
470 by *Vg* knockdown. However, the expression of miR-2796 in fat body groups (GFFb and  
471 VFFb) is basal (intensity less than 80 digitally units). Greenberg et al. (2012) found that miR-  
472 2796 expression in forager heads is three times higher than in nurse heads, and that miR-2796  
473 is enriched in the brain relative to all other head tissues. Consistent with previous research  
474 identifying elevated miR-133 expression in foragers (Liu et al., 2012), we found that  
475 expression of miR-133 was suggestively elevated ( $p < 0.10$ ) in response to *Vg* knockdown in  
476 forager fat body. The increased brain expression of miR-92a in our study mirrors the  
477 increased expression in the brains of old foragers (Behura and Whitfield, 2010) and in whole  
478 head forager samples (Liu et al., 2012). Additionally, the reduced expression of let-7 in this  
479 study is consistent with increased expression in whole head nurse samples (Liu et al., 2012)

480 and in the brains of young nurses (Behura and Whitfield, 2010). This agreement offers strong  
481 support for a role for miR-2796, miR-133, miR-92a and let-7 in the regulation of behavioral  
482 maturation in honey bees.

483 The expression pattern for miR-31a in this study is inconsistent with those from Liu  
484 and colleagues (2012). In our study miR-31a expression was elevated in response to *Vg*  
485 knockdown, while Liu et al. (2012) found higher expression in nurses.

486 The overall lack of agreement between these datasets likely reflects the differences in  
487 sample populations. The previous studies compared nurse to forager microRNA expression  
488 patterns (Behura and Whitfield, 2010; Greenberg et al., 2012; Liu et al., 2012). Our focus on a  
489 forager phenotype triggered by *Vg* suppression was designed to identify microRNAs  
490 associated with the behavioral phenotype induced by *Vg* knockdown independent of aging, as  
491 our target individuals were all the same chronological age. All of the individuals in our  
492 sample already transitioned to foraging behavior, thus it is likely that many of the microRNAs  
493 that we identified are part of the mechanism by which *Vg* knockdown induces changes in  
494 foraging bias for nectar versus pollen collection; however, as we do not know the ages at  
495 which the bees in this study initiated foraging behavior, we cannot rule out the possibility that  
496 some of the changes that we observed could be due differences in the amount of foraging  
497 experience between the *Vg* knockdown and control groups (Nelson et al., 2007; Ihle et al.,  
498 2010). The young nurse and old forager sampling design of Behura and Whitfield (2010) may  
499 reflect age-associated changes in microRNA populations rather than genes associated with  
500 behavioral maturation *per se*. The influence of age versus behavioral phenotype can be further  
501 elucidated through functional studies as well as experiments that use demographic  
502 manipulations to compare expression profiles of old foragers, precocious foragers, young  
503 nurses, and old bees who have reverted from a foraging to nursing behavioral phenotypes.

504

#### 505 *Concluding remarks*

506 Behavioral maturation in honey bees is a remarkably plastic process that can be separated  
507 from chronological age or even reversed (Huang and Robinson, 1996). The mechanism  
508 governing the transition from nurse to forager phenotype likely involves the integration of  
509 signals from several remote tissues by the brain (Ament et al., 2008; Nilsen et al., 2010). Our  
510 challenge is to understand how those remote signals are integrated. Recent work suggests that  
511 tissues as diverse as brain and ovary are regulated by the same systemic factors such as



512 juvenile hormone, ecdysteroids, and Vg that form a global network that modulates individual  
513 behavior (Wang et al., 2012a; Wang et al., 2012b). Our findings suggest that microRNAs can  
514 be part of this network, potentially acting both within tissues as local signals and between  
515 tissues as remote signals. The microRNAs identified in this study provide a starting point for  
516 functional tests of specific microRNAs and their targets as we build a more comprehensive  
517 understanding of the regulation of complex social behaviors.

518

## 519 **LIST OF ABBREVIATIONS**

520 3'UTR - 3' untranslated region

521 AChE-2 - acetylcholinesterase

522 ANOVA - analysis of variance

523 dsRNA - double stranded RNA

524 ftz-f1 - fushi tarazu factor 1

525 GEO - Gene Expression Omnibus database

526 GFBr - control forager brain

527 GFFb - control forager fat body

528 GFP - green fluorescent protein

529 HR46 - hormone receptor-like in 46

530 IRS - insulin receptor substrate

531 JH - juvenile hormone

532 Jhi-26 - juvenile hormone inducible protein 26

533 Map - mapmodulin

534 MIAME - Minimum Information About a Microarray Experiment

535 miR - microRNA

536 NCBI - National Center for Biotechnology Information

537 PDK1 - phosphoinositide-dependent kinase-1

538 PI3K - phosphoinositide 3-kinase

539 PIP5K - phosphatidylinositol-4-phosphate-5-kinase

540 PTEN - phosphatase and tensin homolog

541 RNAi - RNA interference

542 SD - standard deviation

543 SE - standard error

544 TYR - tyrosinase receptor  
545 USP - ultraspiracle  
546 VFBr - knockdown forager brain  
547 VFFb - knockdown forager fat body  
548 Vg – vitellogenin

549

## 550 APPENDIX

551

552 **Table A1** Honey bee protein-coding genes described to be involved in behavioral maturation.  
553 Their predicted or validated 3' untranslated region (UTR) were recovered from NCBI-  
554 GenBank and used for microRNA target prediction.

555

556 **Table A2** Sequences of the most relevant honey bee mature microRNAs found in this study  
557 and used for target prediction analysis. Sequences were recovered from miRBase, release 17  
558 (<http://www.mirbase.org>).

559

560 **Table A3** List of 72 honey bee microRNAs undetected in this study (based on information  
561 available in miRBase release 17).

562

563 **Table A4** Top 10 housekeeper microRNA candidates in brain and fat body tissues. By means  
564 of T test (see p-value) and Log2 ratio, expression level (Mean±SD) of each microRNA is  
565 similar between compared groups of the same tissue. However, although expression levels of  
566 the highlighted microRNAs (with black background) are similar between both tissues, they  
567 are differentially expressed according to an ANOVA comparison considering  $p < 0.05$ . The  
568 only exception is ame-miR-263, the expression of which is similar when all 4 groups were  
569 compared (ANOVA,  $p > 0.09$ ).

570

## 571 ACKNOWLEDGMENTS

572 We are grateful to Ying Wang, Flávia Freitas, Erin Fennern, Osman Kaftanoglu, Abuzer  
573 Akyol, Daniel Pinheiro, Érica Tanaka, Michelle Soares and Adam Dolezal for assistance.

574

## 575 AUTHOR CONTRIBUTIONS

576 The study was conceived by FMFN, NSM, ZLPS and GVA. FMFN, NSM and GVA designed  
577 research. FMFN and NSM conducted the study. FMFN, KEI, NSM and GVA analyzed the  
578 data. FMFN, KEI and GVA wrote the manuscript. All authors contributed to discussions of  
579 the data and edited the manuscript. All authors read and approved the final version of the  
580 manuscript.

581

## 582 **COMPETING INTERESTS**

583 No competing interests declared.

584

## 585 **FUNDING**

586 Fundings were provided by Research Council of Norway [grant numbers 180504, 191699,  
587 213976 to GVA], The PEW Charitable Trust (to GVA), Conselho Nacional de  
588 Desenvolvimento Científico e Tecnológico (CNPq), Brazil [grant number 481000/2009-7 to  
589 FMFN], and Fundação de Amparo à Pesquisa do Estado de São Paulo (FAPESP), Brazil  
590 [grant number 11/03171-5 to ZLPS]. FMFN was supported by post-doctoral fellowship from  
591 CNPq [161917/2011-9] and FAPESP [07/07594-2]. KEI was supported by a post-doctoral  
592 fellowship from Arizona State University and the Smithsonian Tropical Research Institute.

593

## 594 **REFERENCES**

595 **Amdam, G. V., Norberg, K., Hagen, A. and Omholt, S. W.** (2003a). Social exploitation of  
596 vitellogenin. *Proc. Natl. Acad. Sci. USA* **100**, 1799-1802.

597 **Amdam, G. V., Simões, Z. L. P., Guidugli, K. R., Norberg, K. and Omholt, S. W.**  
598 (2003b). Disruption of vitellogenin gene function in adult honeybees by intra-abdominal  
599 injection of double-stranded RNA. *BMC Biotechnol.* **3**, 1.

600 **Amdam, G. V., Simões, Z. L. P., Hagen, A., Norberg, K., Schröder, K., Mikkelsen, Ø.,**  
601 **Kirkwood, T. B. and Omholt, S. W.** (2004a). Hormonal control of the yolk precursor  
602 vitellogenin regulates immune function and longevity in honeybees. *Exp. Gerontol.* **39**, 767-  
603 773.

604 **Amdam, G. V., Norberg, K., Fondrk, M. K. and Page, R. E. Jr.** (2004b). Reproductive  
605 ground plan may mediate colony-level selection effects on individual foraging behavior in  
606 honey bees. *Proc. Natl. Acad. Sci. USA* **101**, 11350-11355.

607 **Amdam, G. V., Norberg, K., Page, R. E. Jr., Erber, J. and Scheiner, R.** (2006).  
608 Downregulation of vitellogenin gene activity increases the gustatory responsiveness of honey  
609 bee workers (*Apis mellifera*). *Behav. Brain Res.* **169**, 201-205.

610 **Ament, S. A., Chan, Q. W., Wheeler, M. M., Nixon, S. E., Johnson, S. P., Rodriguez-Zas,**  
611 **S. L., Foster, L. J. and Robinson, G. E.** (2011). Mechanisms of stable lipid loss in a social  
612 insect. *J. Exp. Biol.* **214**, 3808-3821.

613 **Ament, S. A., Corona, M., Pollock, H. S. and Robinson, G. E.** (2008). Insulin signaling is  
614 involved in the regulation of worker division of labor in honey bee colonies. *Proc. Natl. Acad.*  
615 *Sci. USA* **105**, 4226-4231.

616 **Ament, S. A., Wang, Y., Chen, C. C., Blatti, C. A., Hong, F., Liang, Z. S., Negre, N.,**  
617 **White, K. P., Rodriguez-Zas, S. L., Mizzen, C. A., et al.** (2012). The transcription factor  
618 ultraspiracle influences honey bee social behavior and behavior-related gene expression. *PLoS*  
619 *Genet.* **8**, e1002596.

620 **Ballman, K. V.** (2008). Genetics and genomics: gene expression microarrays. *Circulation*  
621 **118**, 1593-1597.

622 **Barchuk, A. R., Maleszka, R. and Simões, Z. L.** (2004). *Apis mellifera* ultraspiracle: cDNA  
623 sequence and rapid up-regulation by juvenile hormone. *Insect Mol Biol.* **13**, 459-467.

624 **Bartel, D. P.** (2009). MicroRNAs: target recognition and regulatory functions. *Cell* **136**, 215-  
625 233.

626 **Behura, S. K. and Whitfield, C. W.** (2010). Correlated expression patterns of microRNA  
627 genes with age-dependent behavioural changes in honeybee. *Insect Mol. Biol.* **19**, 431-439.

628 **Bentwich, I.** (2005). Prediction and validation of microRNAs and their targets. *FEBS Lett.*  
629 **579**, 5904-5910.

630 **Brazma, A., Hingamp, P., Quackenbush, J., Sherlock, G., Spellman, P., Stoeckert, C.,**  
631 **Aach, J., Ansorge, W., Ball, C. A., Causton, H. C., et al.** (2001). Minimum information  
632 about a microarray experiment (MIAME)-toward standards for microarray data. *Nat Genet.*  
633 **29**, 365-371.

634 **Bryant, B., Macdonald, W. and Raikhel, A. S.** (2010). microRNA miR-275 is indispensable  
635 for blood digestion and egg development in the mosquito *Aedes aegypti*. *Proc. Natl. Acad.*  
636 *Sci. USA* **107**, 22391-22398.

637 **Chen, C., Ridzon, D., Lee, C. T., Blake, J., Sun, Y. and Strauss, W. M.** (2007). Defining  
638 embryonic stem cell identity using differentiation-related microRNAs and their potential  
639 targets. *Mamm. Genome* **18**, 316-327.

640 **Chen, X., Yu, X., Cai, Y., Zheng, H., Yu, D., Liu, G., Zhou, Q., Hu, S. and Hu, F.** (2010).  
641 Next-generation small RNA sequencing for microRNAs profiling in the honey bee *Apis*  
642 *mellifera*. *Insect Mol. Biol.* **19**, 799-805.

643 **Cristino, A. S., Tanaka, E. D., Rubio, M., Piulachs, M. D., Belles, X.** (2011). Deep  
644 sequencing of organ- and stage-specific microRNAs in the evolutionarily basal insect  
645 *Blattella germanica* (L.) (Dictyoptera, Blattellidae). *PLOS ONE*. **6**, e19350.

646 **Desai, S. D., Eu, Y. J., Whyard, S. and Currie, R. W.** (2012). Reduction in deformed wing  
647 virus infection in larval and adult honey bees (*Apis mellifera* L.) by double-stranded RNA  
648 ingestion. *Insect Mol. Biol.* **21**, 446-455.

649 **Dreller, C. and Tarpy, D. R.** (2000). Perception of the pollen need by foragers in a honeybee  
650 colony. *Anim. Behav.* **59**, 91-96.

651 **Drummond, M. J., McCarthy, J. J., Fry, C. S., Esser, K. A. and Rasmussen, B. B.** (2008).  
652 Aging differentially affects human skeletal muscle microRNA expression at rest and after an  
653 anabolic stimulus of resistance exercise and essential amino acids. *Am. J. Physiol. Endocrinol.*  
654 *Metab.* **295**, E1333-E1340.

655 **Engels, W.** (1974). Occurrence and significance of vitellogenins in female castes of social  
656 Hymenoptera. *Am. Zool.* **14**, 1229-1237.

657 **Farooqui, T., Robinson, K., Vaessin, H. and Smith, B. H.** (2003). Modulation of early  
658 olfactory processing by an octopaminergic reinforcement pathway in the honeybee. *J.*  
659 *Neurosci.*, **23**, 5370-5380.

660 **Farooqui, T., Vaessin, H. and Smith, B. H.** (2004). Octopamine receptors in the honeybee  
661 (*Apis mellifera*) brain and their disruption by RNA-mediated interference. *J. Insect Physiol.*  
662 **50**, 701-713.

663 **Fullaondo, A. and Lee, S. Y.** (2012). Identification of putative miRNA involved in  
664 *Drosophila melanogaster* immune response. *Dev. Comp. Immunol.* **36**, 267-273.

665 **Gaidatzis, D., van Nimwegen, E., Hausser, J. and Zavolan, M.** (2007). Inference of  
666 miRNA targets using evolutionary conservation and pathway analysis. *BMC Bioinformatics* **8**,  
667 69.

668 **Garbuzov, A. and Tatar, M.** (2010). Hormonal regulation of *Drosophila* microRNA let-7  
669 and miR-125 that target innate immunity. *Fly* **4**, 306-311.

670 **Greenberg, J. K., Xia, J., Zhou, X., Thatcher, S. R., Gu, X., Ament, S. A., Newman, T.**  
671 **C., Green, P. J., Zhang, W., Robinson, G. E., et al.** (2012). Behavioral plasticity in honey  
672 bees is associated with differences in brain microRNA transcriptome. *Genes Brain Behav.* **11**,  
673 660-670.

674 **Guidugli, K. R., Nascimento, A. M., Amdam, G. V., Barchuk, A. R., Omholt, S., Simões,**  
675 **Z. L. P. and Hartfelder, K.** (2005). Vitellogenin regulates hormonal dynamics in the worker  
676 caste of a eusocial insect. *FEBS Lett.* **579**, 4961-4965.

677 **Gunaratne, P. H., Lin, Y. C., Benham, A. L., Drnevich, J., Coarfa, C., Tennakoon, J. B.,**  
678 **Creighton, C. J., Kim, J. H., Milosavljevic, A., Watson, M., et al.** (2011). Song exposure  
679 regulates known and novel microRNAs in the zebra finch auditory forebrain. *BMC Genomics*  
680 **12**, 277.

681 **Honeybee Genome Sequencing Consortium** (2006). Insights into social insects from the  
682 genome of the honeybee *Apis mellifera*. *Nature* **443**, 931-949.

683 **Hori, S., Kaneko, K., Saito, T. H., Takeuchi, H. and Kubo, T.** (2011). Expression of two  
684 microRNAs, ame-mir-276 and -1000, in the adult honeybee (*Apis mellifera*) brain. *Apidologie*  
685 **42**, 89-102.

686 **Hornstein, E. and Shomron, N.** (2006). Canalization of development by microRNAs. *Nat.*  
687 *Genet.* **38**, S20-S24.

688 **Huang, Z. Y., Robinson, G. E., Tobe, S. S., Yaki, K. J., Strambi, C., Strambi, A. and**  
689 **Stay B.** (1991). Hormonal-regulation of behavioral development in the honey-bee is based on  
690 changes in the rate of juvenile hormone biosynthesis. *J. Insect Physiol.* **37**, 733-741.

691 **Huang, Z. Y. and Robinson, G. E.** (1996). Regulation of honey bee division of labor by  
692 colony age demography. *Behav. Ecol. Sociobiol.* **39**, 147-158.

693 **Hulsmans, M., De Keyzer, D. and Holvoet, P.** (2011). MicroRNAs regulating oxidative  
694 stress and inflammation in relation to obesity and atherosclerosis. *FASEB J.* **25**, 2515-2527.

695 **Ihle, K. E., Page, R. E., Frederick, K., Fondrk, M. K. and Amdam, G. V.** (2010).  
696 Genotype effect on regulation of behaviour by vitellogenin supports reproductive origin of  
697 honeybee foraging bias. *Anim. Behav.* **79**, 1001-1006.

698 **Jarosch, A. and Moritz, R. F.** (2011). Systemic RNA-interference in the honeybee *Apis*  
699 *mellifera*: tissue dependent uptake of fluorescent siRNA after intra-abdominal application  
700 observed by laser-scanning microscopy. *J. Insect Physiol.* **57**, 851-857.

701 **Jin, K., Xue, C., Wu, X., Qian, J., Zhu, Y., Yang, Z., Yonezawa, T., Crabbe, M. J., Cao,**  
702 **Y., Hasegawa, M., et al.** (2011). Why does the giant panda eat bamboo? A comparative  
703 analysis of appetite-reward-related genes among mammals. *PLOS ONE* **6**, e22602.

704 Jones, G. and Sharp, P. A. (1997). Ultraspiracle: an invertebrate nuclear receptor for juvenile  
705 hormones. *Proc Natl Acad Sci U S A* **94**,13499-13503.

706 **Kadener, S., Menet, J. S., Sugino, K., Horwich, M. D., Weissbein, U., Nawathean, P.,**  
707 **Vagin, V. V., Zamore, P. D., Nelson, S. B. and Rosbash, M.** (2009). A role for microRNAs  
708 in the *Drosophila* circadian clock. *Genes Dev.* **23**, 2179-2191.

709 **Kamakura, M.** (2011). Royalactin induces queen differentiation in honeybees. *Nature* **473**,  
710 478-483.

711 **Kozomara, A. and Griffiths-Jones, S.** (2011). miRBase: integrating microRNA annotation  
712 and deep-sequencing data. *Nucleic Acids Res.* **39**, D152-D157.

713 **Li, H., Xi, Q., Xiong, Y., Cheng, X., Qi, Q., Yang, L., Shu, G., Wang, S., Wang, L., Gao,**  
714 **P., et al.** (2011). A comprehensive expression profile of microRNAs in porcine pituitary.  
715 *PLOS ONE* **6**, e24883.

716 **Liu, F., Peng, W., Li, Z., Li, W., Li, L., Pan, J., Zhang, S., Miao, Y., Chen, S. and Su, S.**  
717 (2012). Next-generation small RNA sequencing for microRNAs profiling in *Apis mellifera*:  
718 comparison between nurses and foragers. *Insect Mol. Biol.* **21**, 297-303.

719 **Liu, N., Landreh, M., Cao, K., Abe, M., Hendriks, G. J., Kennerdell, J. R., Zhu, Y.,**  
720 **Wang, L. S. and Bonini, N. M.** (2012). The microRNA miR-34 modulates ageing and  
721 neurodegeneration in *Drosophila*. *Nature* **482**, 519-523.

722 **Liu, S., Gao, S., Zhang, D., Yin, J., Xiang, Z. and Xia, Q.** (2010). MicroRNAs show  
723 diverse and dynamic expression patterns in multiple tissues of *Bombyx mori*. *BMC Genomics*  
724 **11**, 85.

725 **Maori, E., Paldi, N., Shafir, S., Kalev, H., Tsur, E., Glick, E. and Sela, I.** (2009). IAPV, a  
726 bee-affecting virus associated with Colony Collapse Disorder can be silenced by dsRNA  
727 ingestion. *Insect Mol. Biol.* **18**, 55-60.

728 **Marco Antonio, D. S., Guidugli-Lazzarini, K. R., do Nascimento, A. M., Simões, Z. L. P.**  
729 **and Hartfelder, K.** (2008). RNAi-mediated silencing of vitellogenin gene function turns

730 honeybee (*Apis mellifera*) workers into extremely precocious foragers. *Naturwissenschaften*  
731 **95**, 953-961.

732 **Marrone, A. K., Edeleva, E. V., Kucherenko, M. M., Hsiao, N. H. and Shcherbata, H. R.**  
733 (2012). Dg-Dys-Syn1 signaling in *Drosophila* regulates the microRNA profile. *BMC Cell*  
734 *Biol.* **13**, 26.

735 **Mattick, J. S. and Gagen, M. J.** (2001). The evolution of controlled multitasked gene  
736 networks: the role of introns and other noncoding RNAs in the development of complex  
737 organisms. *Mol. Biol. Evol.* **18**, 1611-1630.

738 **Münch, D. and Amdam, G. V.** (2010). The curious case of aging plasticity in honey bees.  
739 *FEBS Lett.* **584**, 2496-2503.

740 **Mustard, J. A., Pham, P. M. and Smith, B. H.** (2010). Modulation of motor behavior by  
741 dopamine and the D1-like dopamine receptor AmDOP2 in the honey bee. *J. Insect Physiol.*  
742 **56**, 422-430.

743 **Nelson, C. M., Ihle, K. E., Fondrk, M. K., Page, R. E. and Amdam, G. V.** (2007). The  
744 gene vitellogenin has multiple coordinating effects on social organization. *PLOS Biol.* **5**, e62.

745 **Nilsen, K. A., Ihle, K. E., Frederick, K., Fondrk, M. K., Smedal, B., Hartfelder, K. and**  
746 **Amdam, G. V.** (2011). Insulin-like peptide genes in honey bee fat body respond differently to  
747 manipulation of social behavioral physiology. *J. Exp. Biol.* **214**, 1488-1497.

748 **Nunes, F. M. F. and Simões, Z. L. P.** (2009). A non-invasive method for silencing gene  
749 transcription in honeybees maintained under natural conditions. *Insect Biochem. Mol. Biol.*  
750 **39**, 157-160.

751 **Page, R. E. and Fondrk, M. K.** (1995). The effects of colony level selection of the social-  
752 organization of honey-bee (*Apis mellifera* L) colonies - colony level components of pollen  
753 hoarding. *Behav. Ecol. Sociobiol.* **36**, 135-144.

754 **Pankiw, T., Page, R. E. and Fondrk, M. K.** (1998). Brood pheromone stimulates pollen  
755 foraging in honey bees (*Apis mellifera*). *Behav. Ecol. Sociobiol.* **44**, 193-198.

756 **Pankiw, T. and Page, R. E.** (2001). Genotype and colony environment affect honeybee (*Apis*  
757 *mellifera* L.) development and foraging behavior. *Behav. Ecol. Sociobiol.* **51**, 87-94.

758 **Patel, A., Fondrk, M. K., Kaftanoglu, O., Emore, C., Hunt, G., Frederick, K. and**  
759 **Amdam, G. V.** (2007). The making of a queen: TOR pathway is a key player in diphenic  
760 caste development. *PLOS ONE* **2**, e509.



761 **Piulachs, M. D., Guidugli, K. R., Barchuk, A. R., Cruz, J., Simões, Z. L. P. and Bellés, X.**  
762 (2003). The vitellogenin of the honey bee, *Apis mellifera*: structural analysis of the cDNA and  
763 expression studies. *Insect Biochem. Mol. Biol.* **33**, 459-465.

764 **Postlethwait, J. H. and Giorgi, F.** (1985). Vitellogenesis in insects. In *Developmental*  
765 *Biology - A Comprehensive Synthesis* (ed. E. Browder), pp. 85-126. New York: Plenum Press.

766 **Rieu, I. and Powers, S. J.** (2009). Real-time quantitative RT-PCR: design, calculations, and  
767 statistics. *Plant Cell* **21**, 1031-1033.

768 **Robinson, G. E.** (1987). Regulation of honey bee age polyethism by juvenile hormone.  
769 *Behav. Ecol. Sociobiol.* **20**, 329-338.

770 **Rutz, W. and Lüscher, M.** (1974). The occurrence of vitellogenin in workers and queens of  
771 *Apis mellifica* and the possibility of its transmission to the queen. *J. Insect Physiol.* **20**, 897-  
772 909.

773 **Seehuus, S. C., Norberg, K., Gimsa, U., Krekling, T. and Amdam, G. V.** (2006).  
774 Reproductive protein protects functionally sterile honey bee workers from oxidative stress.  
775 *Proc. Natl. Acad. Sci. USA* **103**, 962-967.

776 **Seehuus, S. C., Norberg, K., Krekling, T., Fondrk, K. and Amdam, G. V.** (2007).  
777 Immunogold localization of vitellogenin in the ovaries, hypopharyngeal glands and head fat  
778 bodies of honeybee workers, *Apis mellifera*. *J. Insect Sci.* **7**, 1-14.

779 **Shannon, P., Markiel, A., Ozier, O., Baliga, N. S., Wang, J. T., Ramage, D., Amin, N.,**  
780 **Schwikowski, B. and Ideker, T.** (2003). Cytoscape: a software environment for integrated  
781 models of biomolecular interaction networks. *Genome Res.* **13**, 2498-2504.

782 **Shomron, N.** (2010). MicroRNAs and developmental robustness: a new layer is revealed.  
783 *PLOS Biol.* **8**, e1000397.

784 **Shao, N. Y., Hu, H. Y., Yan, Z., Xu, Y., Hu, H., Menzel, C., Li, N., Chen, W. and**  
785 **Khaitovich, P.** (2010). Comprehensive survey of human brain microRNA by deep  
786 sequencing. *BMC Genomics* **11**, 409.

787 **Stark, A., Brennecke, J., Bushati, N., Russell, R. B. and Cohen, S. M.** (2005). Animal  
788 microRNAs confer robustness to gene expression and have a significant impact on 3' UTR  
789 evolution. *Cell* **123**, 1133-1146.

790 **Tanaka, E. D. and Piulachs, M. D.** (2012). Dicer-1 is a key enzyme in the regulation of  
791 oogenesis in panoistic ovaries. *Biol. Cell* **104**, 452-461.

792 **Toth, A. L., Kantarovich, S., Meisel, A. F. and Robinson, G. E.** (2005). Nutritional status  
793 influences socially regulated foraging ontogeny in honey bees. *J. Exp. Biol.* **208**, 4641-4649.

794 **Trajkovski, M., Ahmed, K., Esau, C. C. and Stoffel, M.** (2012). MyomiR-133 regulates  
795 brown fat differentiation through Prdm16. *Nat Cell Biol.* **14**, 1330-1335.

796 **Trenczek, T. and Engels, W.** (1986). Occurrence of vitellogenin in drone honeybees (*Apis*  
797 *mellifica*). *Int. J. Inv. Rep. Dev.* **10**, 307-311.

798 **Vasudevan, S.** (2012). Posttranscriptional upregulation by microRNAs. *Wiley Interdiscip.*  
799 *Rev. RNA* **3**, 311-330.

800 **Velarde, R. A., Robinson, G. E. and Fahrbach, S. E.** (2009). Coordinated responses to  
801 developmental hormones in the Kenyon cells of the adult worker honey bee brain (*Apis*  
802 *mellifera* L.). *J. Insect Physiol.* **55**, 59-69.

803 **Wang, Y., Amdam, G. V., Rueppell, O., Wallrichs, M. A., Fondrk, M. K., Kaftanoglu, O.**  
804 **and Page, R. E. Jr.** (2009). PDK1 and HR46 gene homologs tie social behavior to ovary  
805 signals. *PLOS ONE* **4**, e4899.

806 **Wang, Y., Mutti, N. S., Ihle, K. E., Siegel, A., Dolezal, A. G., Kaftanoglu, O. and**  
807 **Amdam, G. V.** (2010). Down-regulation of honey bee IRS gene biases behavior toward food  
808 rich in protein. *PLOS Genet.* **6**, e1000896.

809 **Wang, Y., Brent, C. S., Fennern, E. and Amdam, G. V.** (2012a). Gustatory perception and  
810 fat body energy metabolism are jointly affected by vitellogenin and juvenile hormone in  
811 honey bees. *PLOS Genet.* **8**, e1002779.

812 **Wang, Y., Kocher, S. D., Linksvayer, T. A., Grozinger, C. M., Page, R. E. Jr. and**  
813 **Amdam, G. V.** (2012b). Regulation of behaviorally associated gene networks in worker  
814 honey bee ovaries. *J. Exp. Biol.* **215**, 124-134.

815 **Weaver, D. B., Anzola, J. M., Evans, J. D., Reid, J. G., Reese, J. T., Childs, K. L.,**  
816 **Zdobnov, E. M., Samanta, M. P., Miller, J. and Elsik, C. G.** (2007). Computational and  
817 transcriptional evidence for microRNAs in the honey bee genome. *Genome Biol.* **8**, R97.

818 **Wei, Z., Liu, X., Feng, T. and Chang, Y.** (2011). Novel and conserved micrnas in Dalian  
819 purple urchin (*Strongylocentrotus nudus*) identified by next generation sequencing. *Int J Biol*  
820 *Sci.* **7**, 180-192.

821 **Winston, M. L.** (1987). *The Biology of the Honey Bee*. Cambridge, MA: Harvard University  
822 Press.

823 **Zhan, S., Merlin, C., Boore, J. L. and Reppert, S. M.** (2011). The monarch butterfly  
824 genome yields insights into long-distance migration. *Cell* **147**, 1171-1185.  
825 **Zhou, X., Zhu, Q., Eicken, C., Sheng, N., Zhang, X., Yang, L. and Gao, X.** (2012).  
826 MicroRNA profiling using  $\mu$ Paraflo microfluidic array technology. *Methods Mol. Biol.* **822**,  
827 153-182.  
828  
829  
830  
831

832 **Table 1** Highly expressed microRNAs (averaged signal above 1,000 intensity units) in brain  
 833 (Br) and fat body (Fb) tissues for control (GF) and *Vg* knockdown (VF) groups. MicroRNAs  
 834 that are highly expressed in a non-tissue specific manner are marked in bold text.

835

| GFB            | Mean   | VFB            | Mean   | GFFb           | Mean   | VFFb           | Mean   |
|----------------|--------|----------------|--------|----------------|--------|----------------|--------|
| <b>miR-252</b> | 41,511 | <b>miR-252</b> | 30,582 | <b>miR-8</b>   | 39,176 | <b>miR-8</b>   | 39,658 |
| <b>miR-87</b>  | 21,817 | <b>miR-184</b> | 18,716 | <b>miR-276</b> | 27,282 | <b>miR-276</b> | 28,091 |
| <b>miR-184</b> | 21,038 | <b>miR-87</b>  | 17,790 | <b>miR-2</b>   | 14,010 | <b>miR-2</b>   | 15,804 |
| <b>miR-276</b> | 15,041 | <b>miR-276</b> | 15,982 | <b>miR-307</b> | 10,916 | <b>miR-307</b> | 10,974 |
| <b>miR-317</b> | 13,069 | <b>miR-317</b> | 14,047 | <b>miR-317</b> | 8,859  | <b>miR-317</b> | 8,880  |
| miR-2796       | 7,638  | miR-2796       | 9,850  | <b>miR-277</b> | 7,932  | <b>miR-277</b> | 7,522  |
| <b>miR-277</b> | 6,042  | <b>miR-34</b>  | 6,853  | <b>bantam</b>  | 5,919  | <b>miR-34</b>  | 5,366  |
| <b>miR-2</b>   | 5,749  | <b>miR-2</b>   | 6,314  | <b>miR-87</b>  | 5,148  | <b>bantam</b>  | 5,363  |
| miR-14         | 4,795  | <b>miR-277</b> | 5,654  | <b>miR-34</b>  | 4,942  | <b>miR-87</b>  | 4,912  |
| <b>miR-34</b>  | 4,709  | miR-210        | 5,122  | miR-12         | 3,779  | <b>miR-13b</b> | 3,156  |
| <b>miR-13b</b> | 4,234  | <b>miR-11</b>  | 3,899  | <b>miR-184</b> | 3,622  | miR-12         | 3,116  |
| miR-7          | 3,416  | <b>miR-13b</b> | 3,344  | miR-1          | 3,298  | <b>miR-184</b> | 3,076  |
| <b>miR-11</b>  | 3,138  | miR-14         | 3,306  | <b>miR-13b</b> | 2,937  | miR-3739       | 2,885  |
| <b>miR-307</b> | 2,570  | miR-7          | 3,042  | miR-275        | 2,334  | miR-275        | 2,580  |
| miR-210        | 2,542  | <b>miR-307</b> | 2,573  | miR-750        | 2,115  | miR-279c       | 2,218  |
| <b>miR-8</b>   | 1,929  | <b>miR-8</b>   | 1,658  | miR-279c       | 1,956  | miR-1          | 2,077  |
| miR-29b        | 1,464  | miR-29b        | 1,268  | <b>miR-11</b>  | 1,876  | <b>miR-11</b>  | 1,936  |
| <b>bantam</b>  | 1,299  | <b>bantam</b>  | 1,132  | <b>miR-252</b> | 1,384  | <b>miR-252</b> | 1,360  |
| let-7          | 1,106  | -              | -      | miR-279        | 1,234  | miR-279        | 1,330  |
| miR-932        | 1,086  | -              | -      | miR-3477       | 1,082  | miR-316        | 1,144  |
| -              | -      | -              | -      | -              | -      | miR-305        | 1,041  |

836

837

838

839 **Table 2** Differentially expressed microRNAs between vitellogenin-suppressed fat bodies of  
 840 forager workers (VFFb) and their respective same-aged controls (GFFb). T-tests were used to  
 841 calculate statistical significance (p-value).

842

| Effect         | microRNA      | p-value  | GFFb  | VFFb  | Fold change |
|----------------|---------------|----------|-------|-------|-------------|
|                |               |          | Mean  | Mean  |             |
| Down-regulated | ame-let-7     | 7.79E-03 | 555   | 345   | 1.6         |
|                | ame-miR-281   | 4.32E-02 | 160   | 78    | 2.0         |
|                | ame-miR-750   | 9.60E-02 | 2,115 | 727   | 2.9         |
| Up-regulated   | ame-miR-3739  | 1.19E-03 | 371   | 2,885 | 7.8         |
|                | ame-miR-3776  | 1.41E-03 | 64    | 373   | 5.9         |
|                | ame-miR-3796  | 9.51E-03 | 42    | 94    | 2.3         |
|                | ame-miR-316   | 1.07E-02 | 759   | 1,144 | 1.5         |
|                | ame-miR-3718a | 3.74E-02 | 103   | 138   | 1.3         |
|                | ame-miR-3749  | 8.08E-02 | 36    | 59    | 1.6         |
|                | ame-miR-3745  | 8.84E-02 | 93    | 148   | 1.6         |
|                | ame-miR-133   | 9.12E-02 | 406   | 551   | 1.4         |

843

844

845 **Table 3** Differentially expressed microRNAs between vitellogenin-suppressed brains of  
 846 forager workers (VFBr) and their respective same-aged controls (GFBr). T-tests were used to  
 847 calculate statistical significance (p-value).

848

| Effect         | microRNA     | p-value  | GFBr   | VFBr   | Fold change |
|----------------|--------------|----------|--------|--------|-------------|
|                |              |          | Mean   | Mean   |             |
| Down-regulated | ame-miR-252  | 1.54E-02 | 41,511 | 30,582 | 1.4         |
|                | ame-miR-1    | 3.80E-02 | 319    | 148    | 2.2         |
|                | ame-miR-375  | 2.99E-02 | 53     | 36     | 1.5         |
| Up-regulated   | ame-miR-989  | 3.35E-02 | 89     | 135    | 1.5         |
|                | ame-miR-92a  | 4.42E-02 | 50     | 68     | 1.4         |
|                | ame-miR-31a  | 4.68E-02 | 95     | 160    | 1.7         |
|                | ame-miR-3049 | 6.18E-02 | 250    | 377    | 1.5         |

849

850

851

852

853 Figure captions

854

855 **Fig. 1** RNAi-mediated *vitellogenin* silencing. *Vitellogenin* mRNA levels (Mean  $\pm$  SE) in (A)  
856 brain (n=30 for dsRNA-GFP and dsRNA-Vg) and (B) fat body (n=30 for dsRNA-GFP and  
857 dsRNA-Vg) tissues of foragers are shown as log<sub>2</sub>-transformed relative quantities (RQ). See  
858 text for statistics.

859

860 **Fig. 2** Number of microRNAs with common or treatment- or tissue-specific expression:  
861 GFBr (control forager brain), VFBr (knockdown forager brain), GFFb  
862 (control forager fat body), and VFFb (knockdown forager fat body). Venn diagram was  
863 generated using <http://bioinfogp.cnb.csic.es/tools/venny/index.html> and microRNA  
864 microarray-based data (this study).

865

866 **Fig. 3** Integrative mRNA-microRNA predictive networks. Coding-genes are represented by  
867 squares containing gene name abbreviations. MicroRNAs are indicated by circles containing  
868 microRNA identification numbers. Down-regulated microRNAs in  
869 knockdown forager fat body are marked in green. Up-regulated microRNAs in  
870 knockdown forager fat body are marked in red. Down-regulated microRNAs in  
871 knockdown forager brain are marked in yellow. Up-regulated microRNAs in  
872 knockdown forager fat body are marked in blue.

873

874

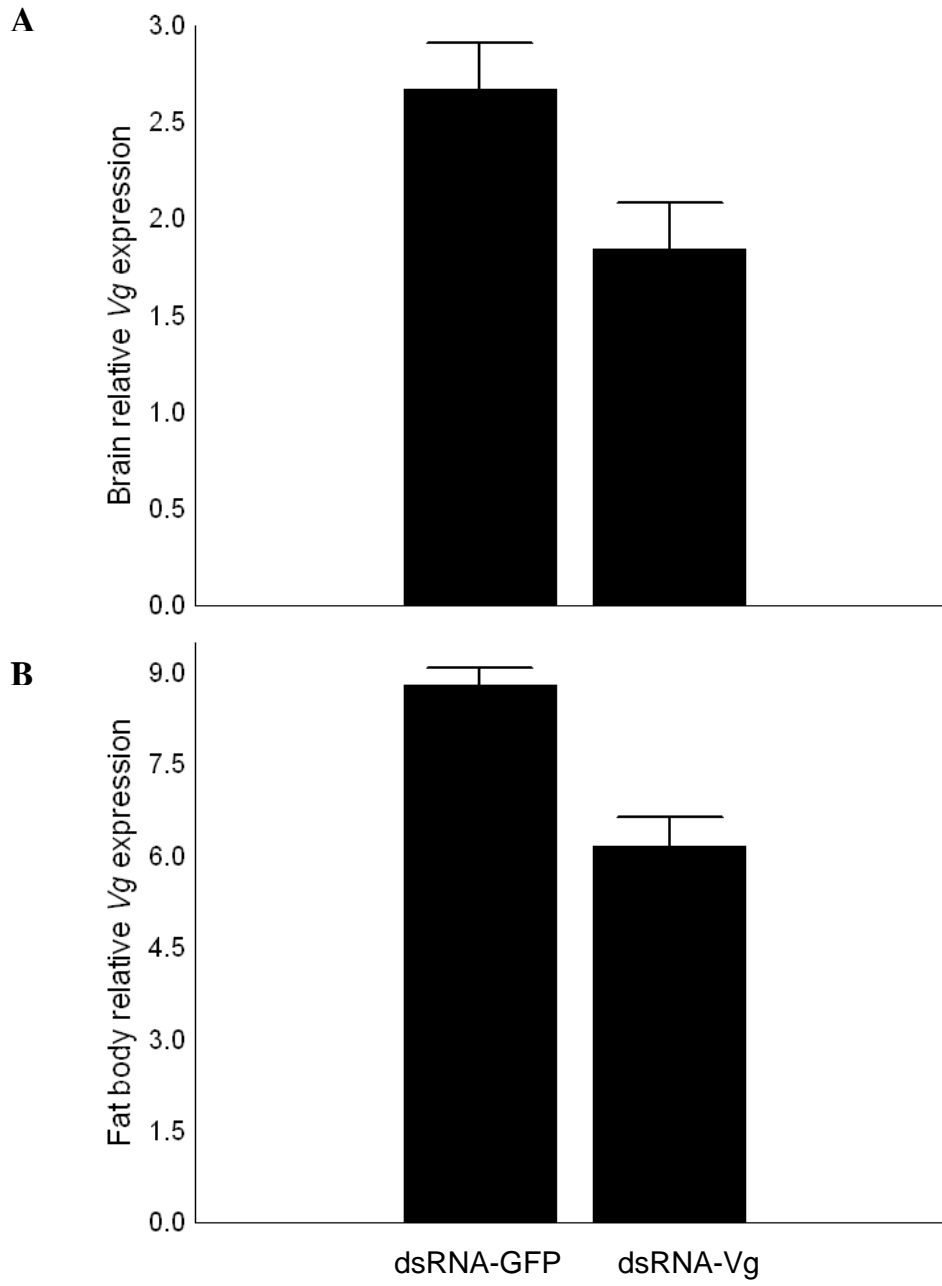

880 **Fig. 2**

881

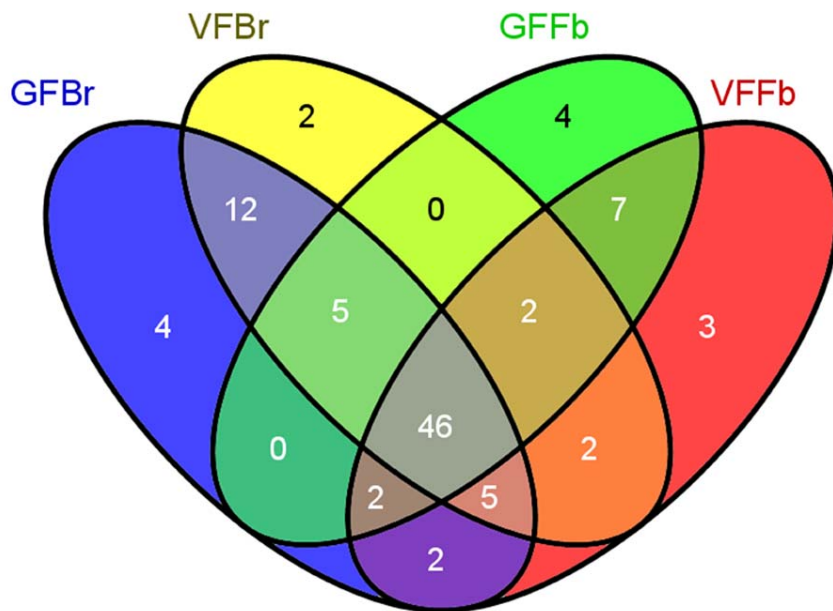

882



883 **Fig. 3**

884

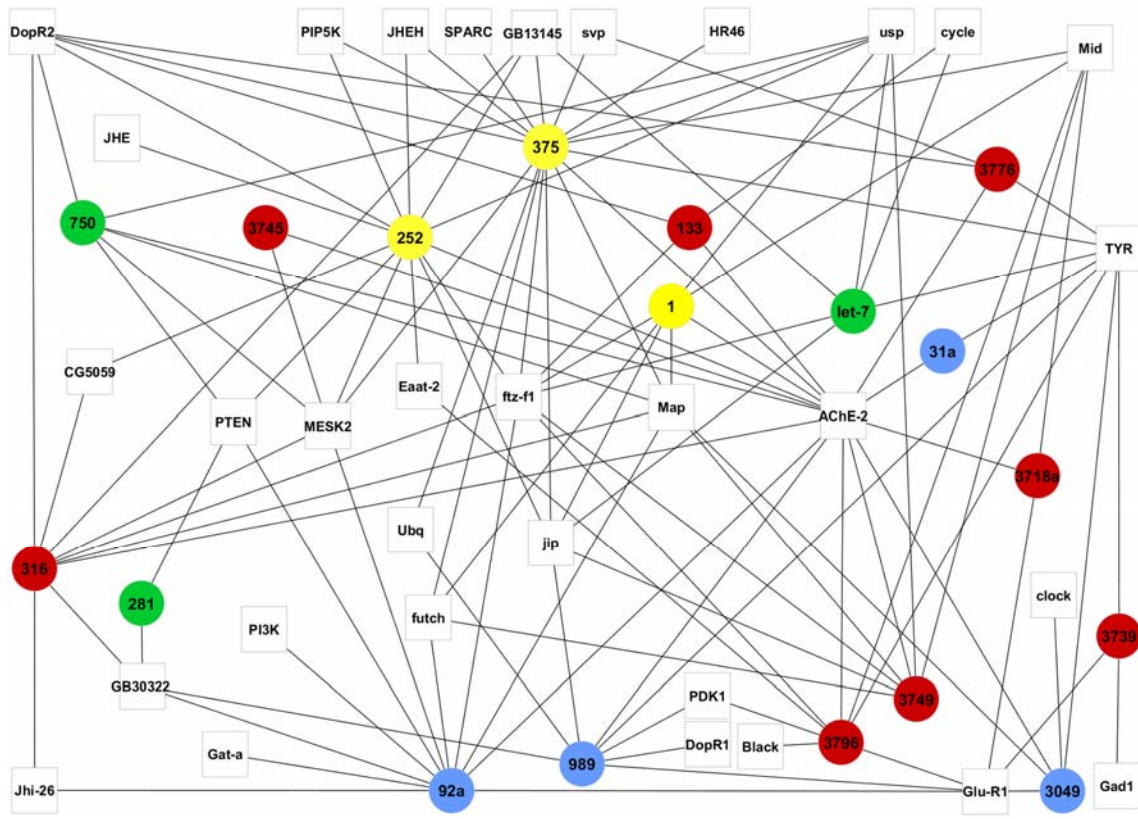

**A**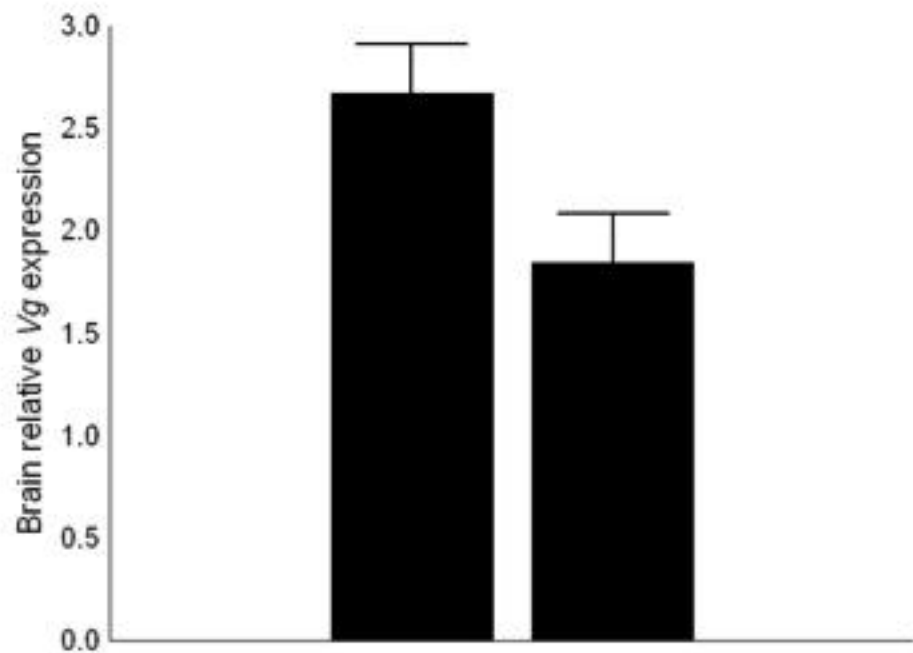**B**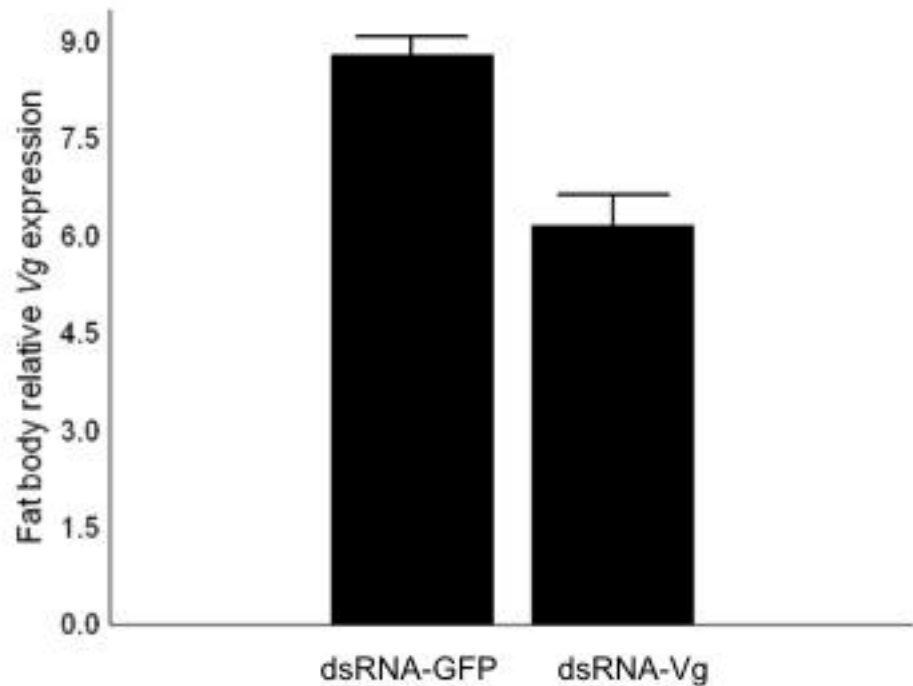

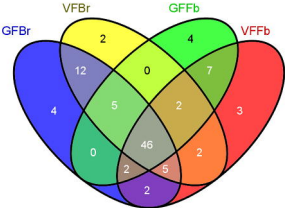

**Table 1**

| GFB            | Mean   | VFB            | Mean   | GFF            | Mean   | VFF            | Mean   |
|----------------|--------|----------------|--------|----------------|--------|----------------|--------|
| <b>miR-252</b> | 41,511 | <b>miR-252</b> | 30,582 | <b>miR-8</b>   | 39,176 | <b>miR-8</b>   | 39,658 |
| <b>miR-87</b>  | 21,817 | <b>miR-184</b> | 18,716 | <b>miR-276</b> | 27,282 | <b>miR-276</b> | 28,091 |
| <b>miR-184</b> | 21,038 | <b>miR-87</b>  | 17,790 | <b>miR-2</b>   | 14,010 | <b>miR-2</b>   | 15,804 |
| <b>miR-276</b> | 15,041 | <b>miR-276</b> | 15,982 | <b>miR-307</b> | 10,916 | <b>miR-307</b> | 10,974 |
| <b>miR-317</b> | 13,069 | <b>miR-317</b> | 14,047 | <b>miR-317</b> | 8,859  | <b>miR-317</b> | 8,880  |
| miR-2796       | 7,638  | miR-2796       | 9,850  | <b>miR-277</b> | 7,932  | <b>miR-277</b> | 7,522  |
| <b>miR-277</b> | 6,042  | <b>miR-34</b>  | 6,853  | <b>bantam</b>  | 5,919  | <b>miR-34</b>  | 5,366  |
| <b>miR-2</b>   | 5,749  | <b>miR-2</b>   | 6,314  | <b>miR-87</b>  | 5,148  | <b>bantam</b>  | 5,363  |
| miR-14         | 4,795  | <b>miR-277</b> | 5,654  | <b>miR-34</b>  | 4,942  | <b>miR-87</b>  | 4,912  |
| <b>miR-34</b>  | 4,709  | miR-210        | 5,122  | miR-12         | 3,779  | <b>miR-13b</b> | 3,156  |
| <b>miR-13b</b> | 4,234  | <b>miR-11</b>  | 3,899  | <b>miR-184</b> | 3,622  | miR-12         | 3,116  |
| miR-7          | 3,416  | <b>miR-13b</b> | 3,344  | miR-1          | 3,298  | <b>miR-184</b> | 3,076  |
| <b>miR-11</b>  | 3,138  | miR-14         | 3,306  | <b>miR-13b</b> | 2,937  | miR-3739       | 2,885  |
| <b>miR-307</b> | 2,570  | miR-7          | 3,042  | miR-275        | 2,334  | miR-275        | 2,580  |
| miR-210        | 2,542  | <b>miR-307</b> | 2,573  | miR-750        | 2,115  | miR-279c       | 2,218  |
| <b>miR-8</b>   | 1,929  | <b>miR-8</b>   | 1,658  | miR-279c       | 1,956  | miR-1          | 2,077  |
| miR-29b        | 1,464  | miR-29b        | 1,268  | <b>miR-11</b>  | 1,876  | <b>miR-11</b>  | 1,936  |
| <b>bantam</b>  | 1,299  | <b>bantam</b>  | 1,132  | <b>miR-252</b> | 1,384  | <b>miR-252</b> | 1,360  |
| let-7          | 1,106  | -              | -      | miR-279        | 1,234  | miR-279        | 1,330  |
| miR-932        | 1,086  | -              | -      | miR-3477       | 1,082  | miR-316        | 1,144  |
| -              | -      | -              | -      | -              | -      | miR-305        | 1,041  |

**Table 2**

| Effect         | microRNA      | p-value  | GFFb  | VFFb  | Fold change |
|----------------|---------------|----------|-------|-------|-------------|
|                |               |          | Mean  | Mean  |             |
| Down-regulated | ame-let-7     | 7.79E-03 | 555   | 345   | 1.6         |
|                | ame-miR-281   | 4.32E-02 | 160   | 78    | 2.0         |
|                | ame-miR-750   | 9.60E-02 | 2,115 | 727   | 2.9         |
| Up-regulated   | ame-miR-3739  | 1.19E-03 | 371   | 2,885 | 7.8         |
|                | ame-miR-3776  | 1.41E-03 | 64    | 373   | 5.9         |
|                | ame-miR-3796  | 9.51E-03 | 42    | 94    | 2.3         |
|                | ame-miR-316   | 1.07E-02 | 759   | 1,144 | 1.5         |
|                | ame-miR-3718a | 3.74E-02 | 103   | 138   | 1.3         |
|                | ame-miR-3749  | 8.08E-02 | 36    | 59    | 1.6         |
|                | ame-miR-3745  | 8.84E-02 | 93    | 148   | 1.6         |
| ame-miR-133    | 9.12E-02      | 406      | 551   | 1.4   |             |

**Table 3**

| Effect         | microRNA     | p-value  | GFB    | VFB    | Fold change |
|----------------|--------------|----------|--------|--------|-------------|
|                |              |          | Mean   | Mean   |             |
| Down-regulated | ame-miR-252  | 1.54E-02 | 41,511 | 30,582 | 1.4         |
|                | ame-miR-1    | 3.80E-02 | 319    | 148    | 2.2         |
|                | ame-miR-375  | 2.99E-02 | 53     | 36     | 1.5         |
| Up-regulated   | ame-miR-989  | 3.35E-02 | 89     | 135    | 1.5         |
|                | ame-miR-92a  | 4.42E-02 | 50     | 68     | 1.4         |
|                | ame-miR-31a  | 4.68E-02 | 95     | 160    | 1.7         |
|                | ame-miR-3049 | 6.18E-02 | 250    | 377    | 1.5         |

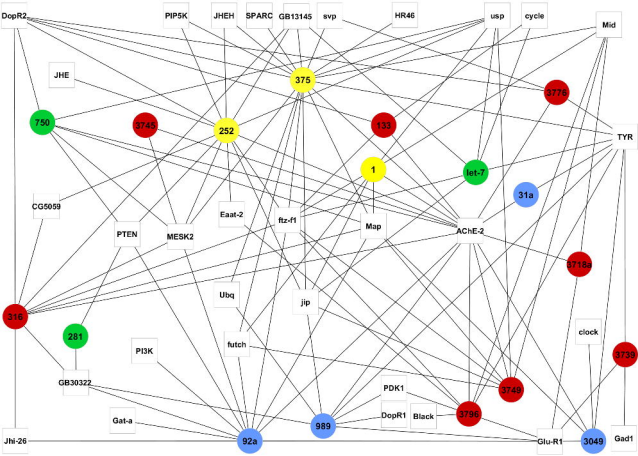

Source: https://cob.silverchair.com/jeb/article-pdf/doi/10.1242/jeb.089243/2037050/jeb_089243.pdf
